# Supplementary material
Source: publisher figshare collection journal article supplement (https://acs.figshare.com/ndownloader/files/8975143)
Supplement: Supplementary file 1 [file 8975143]

**Supporting information for**

**Contact effect of ReS<sub>2</sub>/metal interface**

Jae Young Park<sup>1,‡</sup>, Hang-Eun Joe<sup>1,‡</sup>, Hyong Seo Yoon<sup>1,‡</sup>, SangHyuk Yoo<sup>1</sup>, Taekyeong Kim<sup>2</sup>,  
Keonwook Kang<sup>1</sup>, Byung-Kwon Min<sup>1</sup>, and Seong Chan Jun<sup>1,\*</sup>

<sup>1</sup>Department of Mechanical Engineering, Yonsei University, Seoul 120-749, Republic of  
Korea

<sup>2</sup>Department of Physics, Hankuk University of Foreign Studies, Yongin 449-791, Republic of  
Korea

E-mail: scj@yonsei.ac.kr

\*Correspondence and requests for materials should be addressed to S.C.J. (email: scj@yonsei.ac.kr)

<sup>‡</sup>These authors contributed equally to this article.

**S-1. Fabrication method**

FET devices with ReS<sub>2</sub> channels and several different metal contacts were prepared to estimate the current rectifying performance. First, the ReS<sub>2</sub> flakes were exfoliated and transferred to a SiO<sub>2</sub>/Si substrate. The SiO<sub>2</sub>/Si substrate consists of a p-type Si wafer with thermally-grown SiO<sub>2</sub> surfaces. The thickness of ReS<sub>2</sub> was estimated via AFM profile and the optical color in the optical microscope image. Patterned Al and Pt electrodes with a thickness of 50 nm were fabricated by electron beam lithography (EBL), electron-beam evaporation, and the lift-off process. The transfer method was used to attach graphene to ReS<sub>2</sub> with a PDMS stamp. The device performance was measured by modulating the source/drain and source/gate voltage at room temperature using a Keithley 2400 source meter.

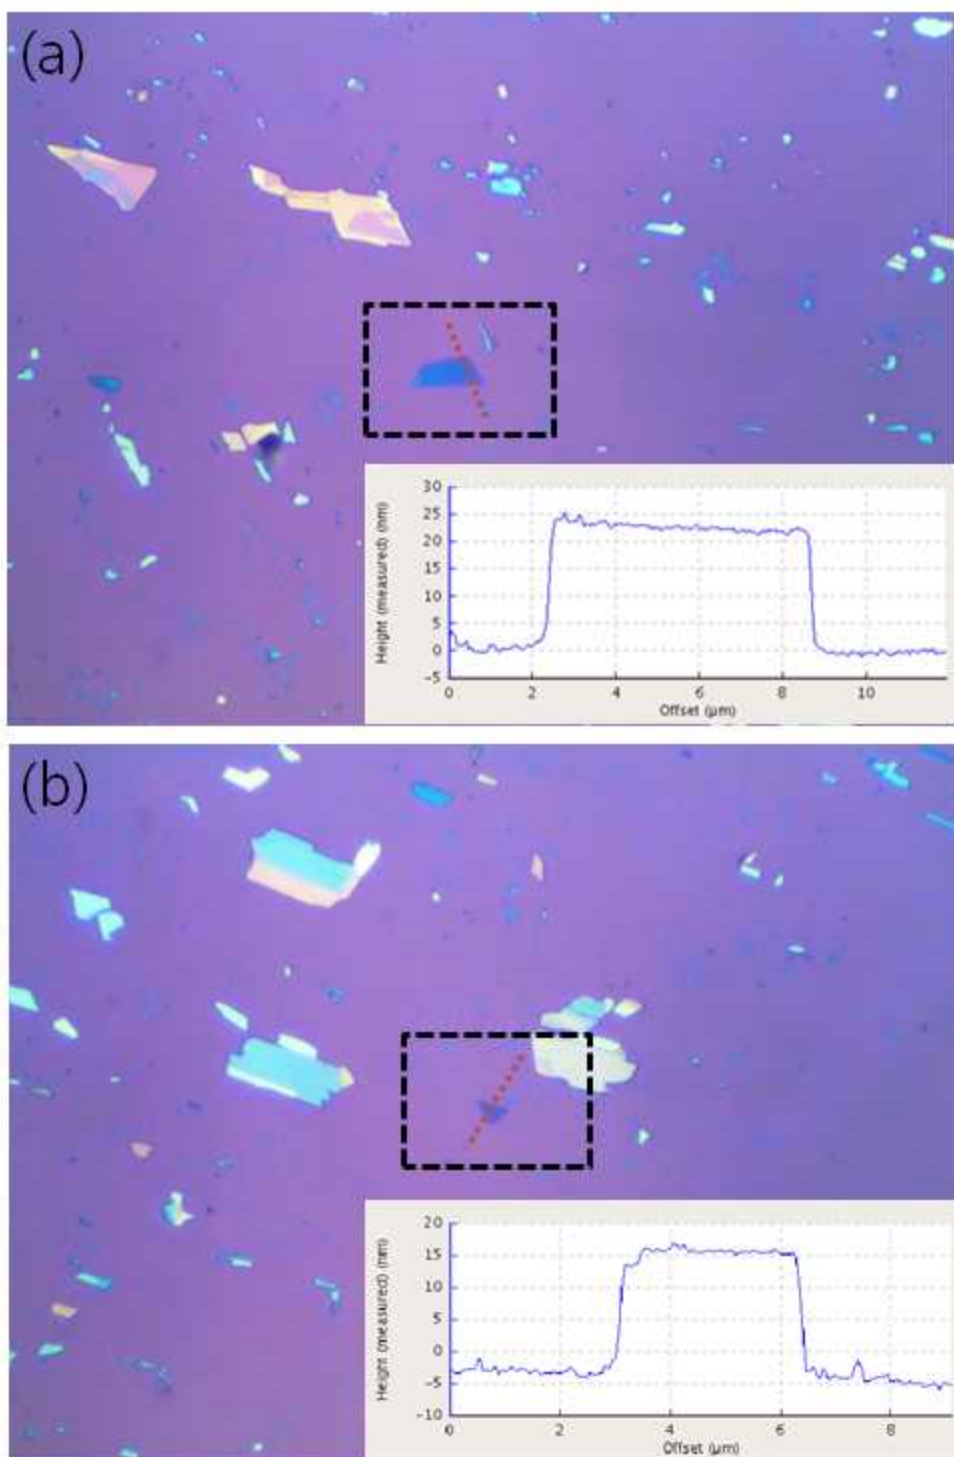

Figure. S1 Thickness of two ReS<sub>2</sub> flakes measured from AFM. (a) 20~25nm thickness (b) 15nm thickness.

## S-2. DFT calculation

### Methods

Ab initio calculations of electron affinity  $\chi$  in  $\text{ReS}_2$  are conducted using VASP (*Vienna ab initio simulation package*)<sup>1-4</sup>. Structural and electronic properties are calculated using GGA-PBE (Perdew-Burke-Ernzerhof) functional with PAW (Projector Augmented-Wave) potentials<sup>5-8</sup>. A cutoff energy for the basis set is extend to 500 eV for throughout all calculations, and convergence criteria of  $10^{-5}$  eV is used for self-consistency. The atomic force criteria of 0.01 eV/Å is used during geometry optimizations by the conjugate gradient method. A  $2 \times 2$  supercell of monolayer  $\text{ReS}_2$  (1L) is constructed with 4 rhenium (Re) atoms and 8 sulfur (S) atoms. K-points for the Brillouin-zone sampling is  $8 \times 8 \times 1$  with Gamma ( $\Gamma$ ) point centered. In Figure S, two-layer (2L) and three-layer (3L) structures are ordered in rhombohedral (ABC) staking<sup>9</sup>. A vacuum spacing of 16 Å perpendicular to the layer is fixed irrespective of the number of layers.

### Results

Direct bandgap  $E_{\text{gap}}$  and electron affinity  $\chi$  of 1L is obtained as 1.42 eV and 4.32 eV, respectively. Similar value of bandgap was reported in other papers<sup>10-12</sup> and experiment value is 1.55 eV from absorption spectroscopy<sup>10</sup>. In Table S1, as the number of layers increases, the bandgap  $E_{\text{gap}}$  is monotonically decreased, while electron affinity  $\chi$  is nearly constant.

Table S1. Electronic properties of ReS<sub>2</sub>: Bandgap  $E_{\text{gap}}$  and Electron affinity  $\chi$

|                       | 1L   | 2L   | 3L   |
|-----------------------|------|------|------|
| $E_{\text{gap}}$ (eV) | 1.42 | 1.31 | 1.26 |
| $\chi$ (eV)           | 4.32 | 4.30 | 4.32 |

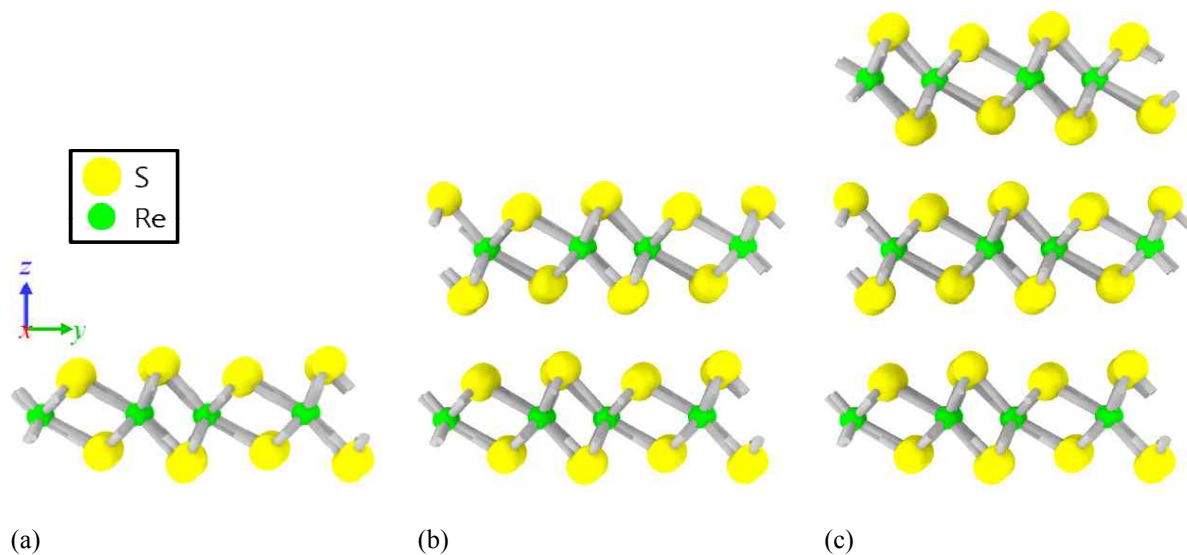

Figure S2. ReS<sub>2</sub> stacked structures: (a) 1L, (b) 2L, (c) 3L

### S-3. Surface potential

The specimen composed of ReS<sub>2</sub> flakes on a gold substrate was prepared to evaluate the surface potential difference between gold and ReS<sub>2</sub>. A 200 nm thick gold coating was deposited on a Si/SiO<sub>2</sub> wafer by using an evaporator, and the ReS<sub>2</sub> flakes were then transferred onto the gold-coated wafer by using a PDMS stamp. The ReS<sub>2</sub> flakes were purchased from 2D-Semiconductors. Kelvin probe force microscopy (XE-7, Park Systems Corp.) was used to measure the surface potential with applied 1V, 17kHz of AC bias voltage and frequency in ambient condition. The work function of Au/Cr tip was calibrated from the work function of HOPG (4.6 eV) which is electrically stable materials.

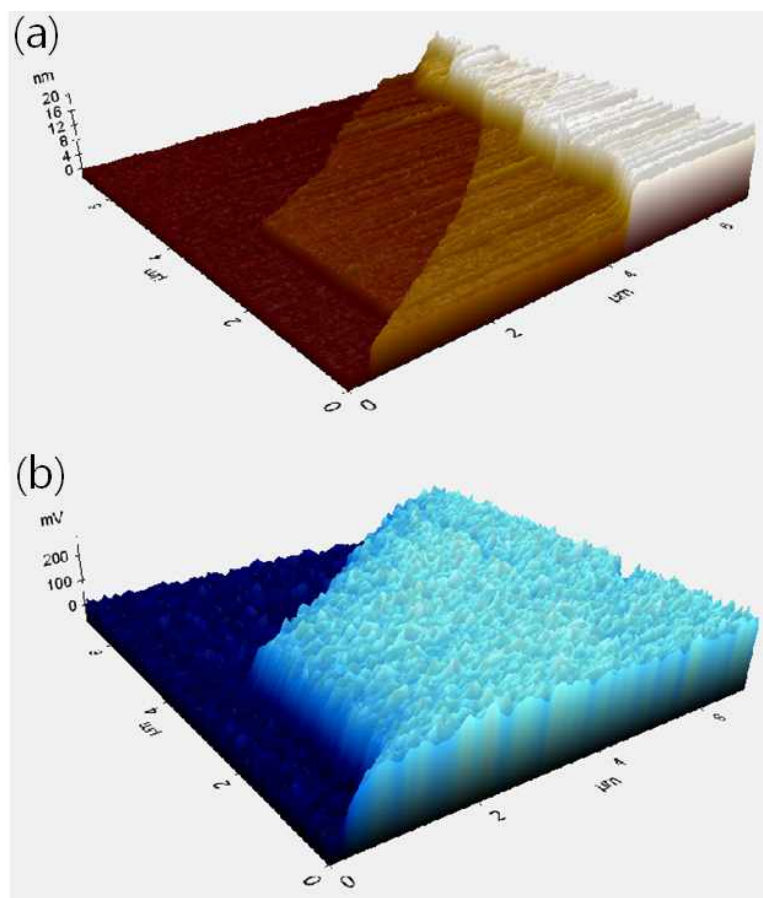

Figure S3. (a) 3D mapping image of AFM (b) 3D mapping image of KPFM

## Reference

1. Kresse, G.; Hafner, J., Ab Initio Molecular Dynamics For Liquid Metals. *Phys. Rev. B* **1993**, *47* (1), 558-561.
2. Kresse, G.; Hafner, J., Ab initio molecular-dynamics simulation of the liquid-metal amorphous-semiconductor transition in germanium. *Phys. Rev. B* **1994**, *49* (20), 14251-14269.
3. Kresse, G.; Furthmüller, J., Efficiency of ab-initio total energy calculations for metals and semiconductors using a plane-wave basis set. *Comput. Mater. Sci.* **1996**, *6* (1), 15-50.
4. Kresse, G.; Furthmüller, J., Efficient Iterative Schemes for Ab Initio Total-Energy Calculations using a Plane-Wave Basis Set. *Physical Review B* **1996**, *54* (16), 11169-11186.
5. Blöchl, P. E., Projector Augmented-Wave Method. *Phys. Rev. B* **1994**, *50* (24), 17953-17979.
6. Kresse, G.; Joubert, D., From Ultrasoft Pseudopotentials to the Projector Augmented-Wave Method. *Phys. Rev. B* **1999**, *59* (3), 1758-1775.
7. Perdew, J. P.; Burke, K.; Ernzerhof, M., Generalized Gradient Approximation Made Simple. *Phys. Rev. Lett.* **1996**, *77* (18), 3865-3868.
8. Perdew, J. P.; Burke, K.; Ernzerhof, M., Generalized Gradient Approximation Made Simple [Phys. Rev. Lett. 77, 3865 (1996)]. *Phys. Rev. Lett.* **1997**, *78* (7), 1396-1396.
9. Murray, H. H.; Kelty, S. P.; Chianelli, R. R.; Day, C. S., Structure of Rhenium Disulfide. *Inorg. Chem.* **1994**, *33* (19), 4418-4420.
10. Tongay, S.; Sahin, H.; Ko, C.; Luce, A.; Fan, W.; Liu, K.; Zhou, J.; Huang, Y.-S.; Ho, C.-H.; Yan, J.; Ogletree, D. F.; Aloni, S.; Ji, J.; Li, S.; Li, J.; Peeters, F. M.; Wu, J.,

Monolayer Behaviour in Bulk ReS<sub>2</sub> due to Electronic and Vibrational Decoupling.

Nat. Commun. **2014**, *5*, 3252.

11. Yu, Z. G.; Cai, Y.; Zhang, Y.-W., Robust Direct Bandgap Characteristics of One- and Two-Dimensional ReS<sub>2</sub>. Sci. Rep **2015**, *5*, 13783.
12. Liu, H.; Xu, B.; Liu, J. M.; Yin, J.; Miao, F.; Duan, C.-G.; Wan, X. G., Highly efficient and ultrastable visible-light photocatalytic water splitting over ReS<sub>2</sub>. *Phys. Chem. Chem. Phys.* **2016**, *18* (21), 14222-14227.
